# Supplementary material for: Progerin impairs chromosome maintenance by depleting CENP-F from metaphase kinetochores in Hutchinson-Gilford progeria fibroblasts
Source: PubMed Central journal article supplement (PMC5029735; doi:10.18632/oncotarget.8267), 2016-03-22
Supplement: oncotarget-07-24700-s001.pdf [file oncotarget-07-24700-s001.pdf]

SUPPLEMENTARY FIGURES

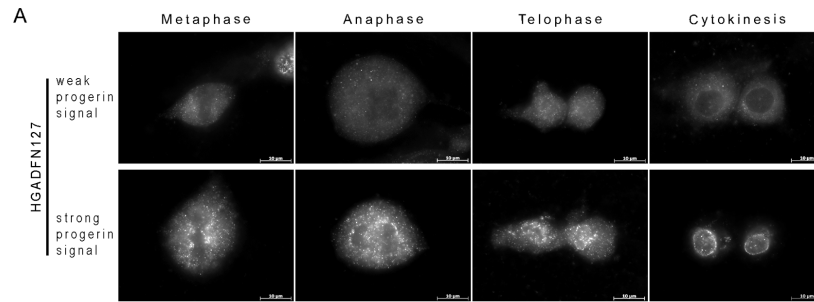

| Lamin A localization                 | % | Total Mitotic cells | Mitotic stages |              |              |              |
|--------------------------------------|---|---------------------|----------------|--------------|--------------|--------------|
|                                      |   |                     | Metaphase      | Anaphase     | Telophase    | Cytokinesis  |
| Progerin weak signal                 |   | 49.79 ± 2.79        | 45.05 ± 1.29   | 48.21 ± 0.81 | 51.11 ± 1.51 | 52.13 ± 1.67 |
| out of which Lamin A is mislocalized |   | 25.16 ± 2.67        | 30.49 ± 0.25   | 24.69 ± 0.22 | 23.91 ± 0.32 | 23.18 ± 0.20 |
| Progerin strong signal               |   | 50.21 ± 2.79        | 54.95 ± 2.26   | 51.79 ± 1.11 | 48.89 ± 2.37 | 47.87 ± 2.23 |
| out of which Lamin A is mislocalized |   | 96.09 ± 0.73        | 95.00 ± 0.96   | 96.55 ± 0.39 | 96.97 ± 0.91 | 96.73 ± 0.73 |

| Lamin B localization                 | % | Total Mitotic cells | Mitotic stages |              |              |              |
|--------------------------------------|---|---------------------|----------------|--------------|--------------|--------------|
|                                      |   |                     | Metaphase      | Anaphase     | Telophase    | Cytokinesis  |
| Progerin weak signal                 |   | 50.20 ± 0.58        | 50.18 ± 1.56   | 50.00 ± 0.92 | 49.34 ± 1.81 | 51.27 ± 1.68 |
| out of which Lamin B is mislocalized |   | 18.47 ± 2.36        | 20.86 ± 0.31   | 20.50 ± 0.21 | 19.64 ± 0.31 | 18.52 ± 0.28 |
| Progerin strong signal               |   | 49.80 ± 0.58        | 49.82 ± 2.19   | 50.00 ± 1.16 | 50.66 ± 2.28 | 48.73 ± 2.18 |
| out of which Lamin B is mislocalized |   | 97.65 ± 0.64        | 97.10 ± 0.67   | 98.00 ± 0.41 | 98.26 ± 0.76 | 97.40 ± 0.63 |

| Emerin localization                 | % | Total Mitotic cells | Mitotic stages |              |              |              |
|-------------------------------------|---|---------------------|----------------|--------------|--------------|--------------|
|                                     |   |                     | Metaphase      | Anaphase     | Telophase    | Cytokinesis  |
| Progerin weak signal                |   | 50.15 ± 1.34        | 48.26 ± 1.45   | 49.18 ± 0.86 | 51.26 ± 1.91 | 49.48 ± 1.73 |
| out of which Emerin is mislocalized |   | 24.68 ± 4.43        | 31.96 ± 0.42   | 23.76 ± 0.20 | 19.67 ± 0.27 | 21.67 ± 0.49 |
| Progerin strong signal              |   | 49.85 ± 1.34        | 51.74 ± 2.22   | 50.82 ± 1.18 | 48.74 ± 2.37 | 50.52 ± 2.17 |
| out of which Emerin is mislocalized |   | 97.14 ± 0.55        | 97.12 ± 0.75   | 97.86 ± 0.45 | 97.41 ± 0.89 | 96.73 ± 0.67 |

| SUN 1 localization                | % | Total Mitotic cells | Mitotic stages |              |              |              |
|-----------------------------------|---|---------------------|----------------|--------------|--------------|--------------|
|                                   |   |                     | Metaphase      | Anaphase     | Telophase    | Cytokinesis  |
| Progerin weak signal              |   | 51.25 ± 1.48        | 49.83 ± 1.56   | 51.39 ± 0.76 | 51.17 ± 1.68 | 49.60 ± 1.31 |
| out of which SUN1 is mislocalized |   | 26.84 ± 1.72        | 29.66 ± 0.37   | 26.56 ± 0.14 | 25.89 ± 0.25 | 25.97 ± 0.28 |
| Progerin strong signal            |   | 48.75 ± 1.48        | 50.17 ± 2.28   | 48.61 ± 1.20 | 48.83 ± 2.44 | 50.40 ± 2.31 |
| out of which SUN1 is mislocalized |   | 98.04 ± 0.81        | 98.63 ± 0.73   | 98.25 ± 0.45 | 98.94 ± 0.92 | 96.49 ± 0.89 |

| NPC 414 localization                 | % | Total Mitotic cells | Mitotic stages |              |              |              |
|--------------------------------------|---|---------------------|----------------|--------------|--------------|--------------|
|                                      |   |                     | Metaphase      | Anaphase     | Telophase    | Cytokinesis  |
| Progerin weak signal                 |   | 49.74 ± 1.22        | 48.74 ± 2.05   | 50.57 ± 1.05 | 50.51 ± 2.04 | 51.52 ± 1.89 |
| out of which NPC 414 is mislocalized |   | 8.82 ± 0.76         | 9.28 ± 0.24    | 7.95 ± 0.13  | 9.33 ± 0.19  | 9.95 ± 0.19  |
| Progerin strong signal               |   | 50.26 ± 1.22        | 51.26 ± 2.30   | 49.43 ± 1.17 | 49.49 ± 2.27 | 48.48 ± 2.02 |
| out of which NPC 414 is mislocalized |   | 97.20 ± 0.74        | 97.06 ± 0.86   | 97.67 ± 0.43 | 97.96 ± 0.74 | 96.67 ± 0.45 |

| Aurora B localization                 | % | Total Mitotic cells | Mitotic stages |              |              |              |
|---------------------------------------|---|---------------------|----------------|--------------|--------------|--------------|
|                                       |   |                     | Metaphase      | Anaphase     | Telophase    | Cytokinesis  |
| Progerin weak signal                  |   | 50.85 ± 2.17        | 50.18 ± 1.95   | 52.59 ± 1.16 | 53.89 ± 2.26 | 51.77 ± 1.80 |
| out of which Aurora B is mislocalized |   | 11.85 ± 3.08        | 14.71 ± 0.17   | 12.02 ± 0.18 | 12.50 ± 0.26 | 11.71 ± 0.15 |
| Progerin strong signal                |   | 49.15 ± 2.17        | 49.82 ± 2.18   | 47.41 ± 1.19 | 46.11 ± 2.38 | 48.23 ± 2.06 |
| out of which Aurora B is mislocalized |   | 95.33 ± 2.22        | 91.85 ± 0.90   | 95.15 ± 0.48 | 97.75 ± 0.84 | 96.86 ± 0.43 |

| Cenp-F localization                 | % | Total Mitotic cells | Mitotic stages |              |              |              |
|-------------------------------------|---|---------------------|----------------|--------------|--------------|--------------|
|                                     |   |                     | Metaphase      | Anaphase     | Telophase    | Cytokinesis  |
| Progerin weak signal                |   | 51.66 ± 1.92        | 53.75 ± 1.55   | 51.49 ± 0.92 | 48.84 ± 1.98 | 49.46 ± 1.71 |
| out of which Cenp-F is mislocalized |   | 17.30 ± 3.13        | 22.09 ± 0.57   | 19.23 ± 0.15 | 18.25 ± 0.31 | 17.49 ± 0.25 |
| Progerin strong signal              |   | 48.34 ± 1.92        | 46.25 ± 2.29   | 48.51 ± 1.26 | 51.16 ± 2.25 | 50.54 ± 2.37 |
| out of which Cenp-F is mislocalized |   | 96.89 ± 1.49        | 97.30 ± 0.74   | 97.45 ± 0.53 | 97.73 ± 0.76 | 93.58 ± 1.08 |

Supplementary Figure S1: Evaluation of the frequency of mislocalized nuclear proteins in HGPS mitotic cells at different stages.

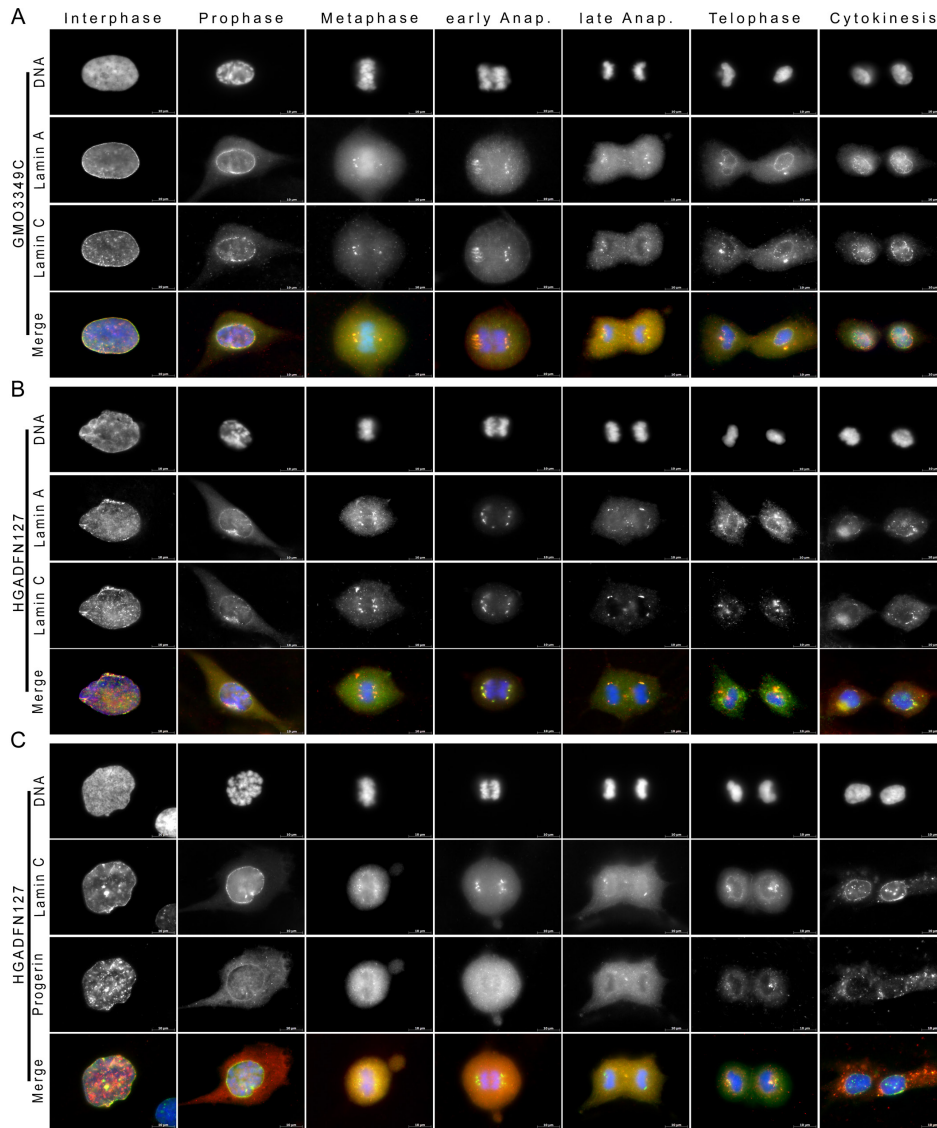

**Supplementary Figure S2: Lamin A and Lamin C are colocalized during mitosis but their recruitment to daughter nuclei is delayed in HGPS cells.**

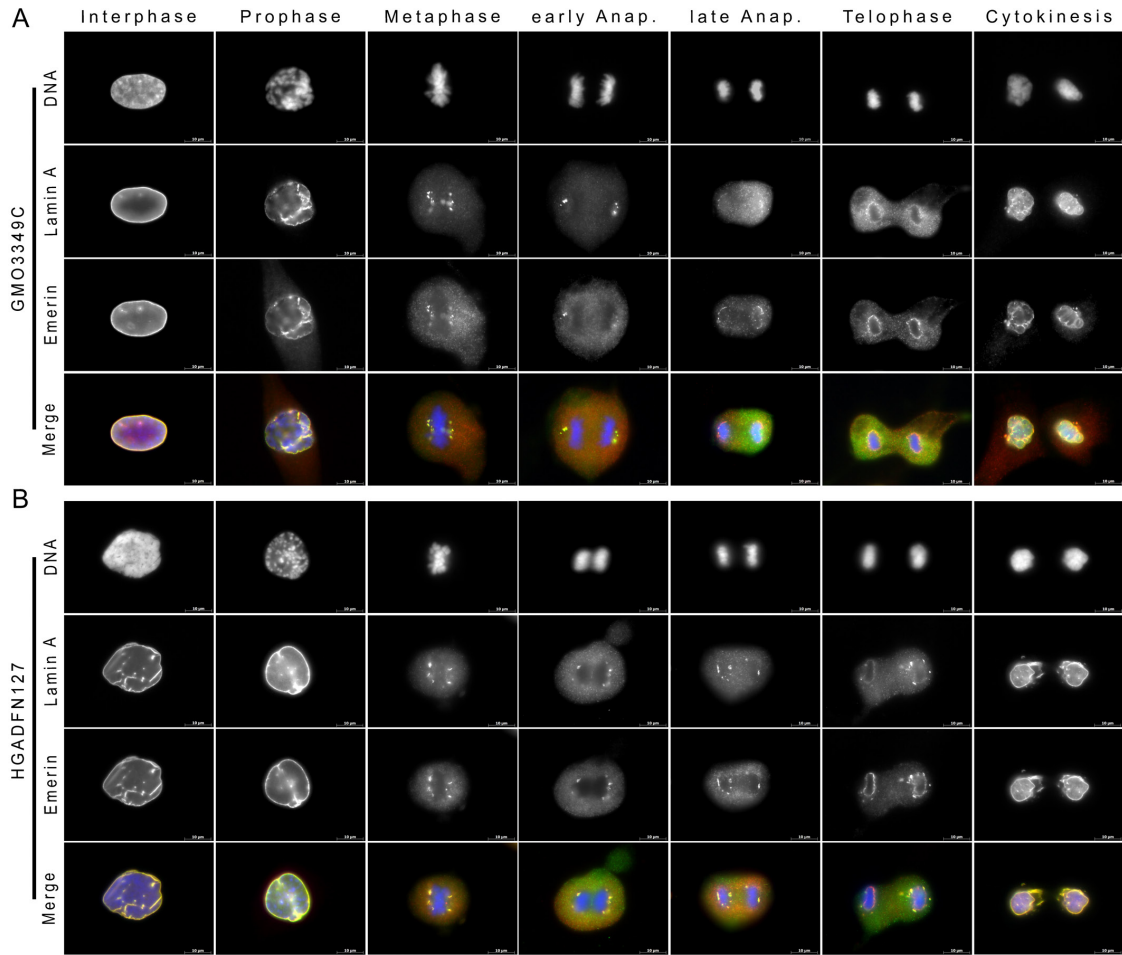

Supplementary Figure S3: Lamin A colocalized with Emerin but their recruitment to daughter nuclei is delayed in HGPS cells.

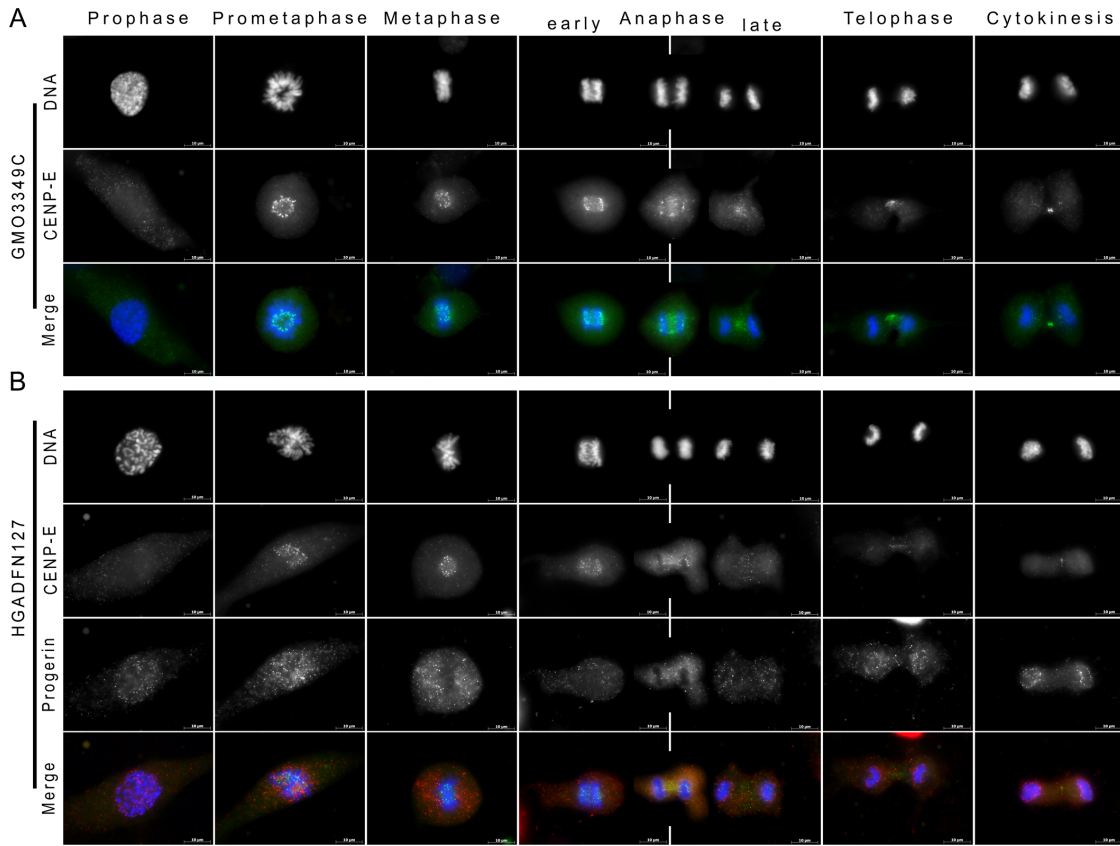

Supplementary Figure S4: CENP-E localization to the spindle midzone during anaphase is delayed in HGPS fibroblasts.

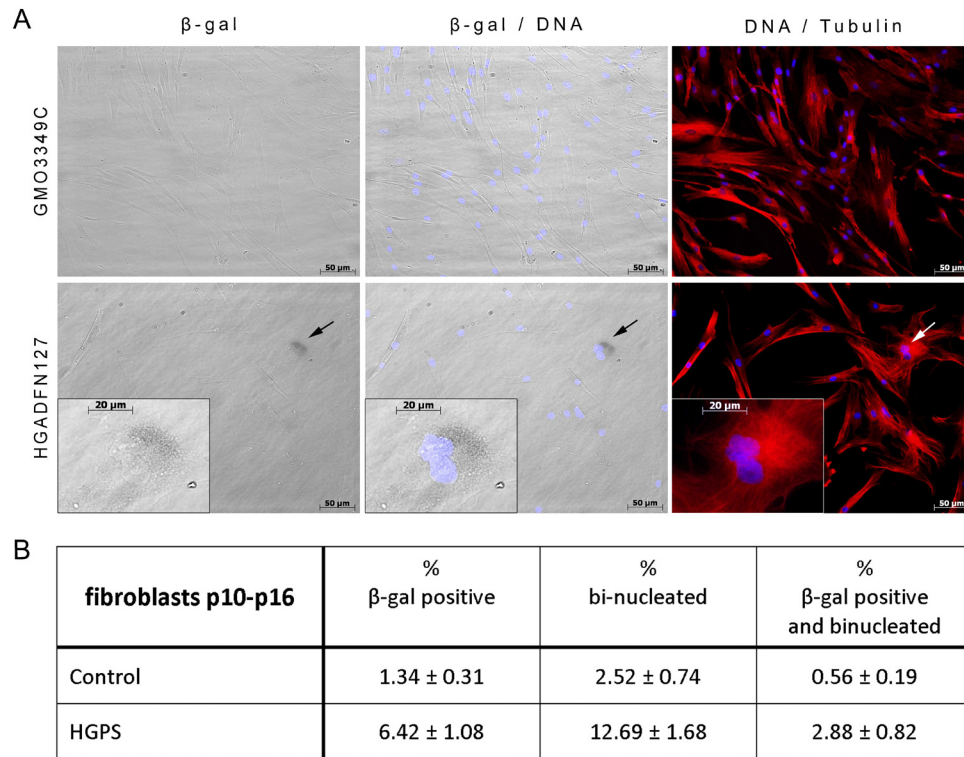

Supplementary Figure S5: Senescence detection using  $\beta$ -galactosidase staining revealed an increased number of senescent binucleated cells in the HGPS cultures.
